# Race, Ethnicity, Language, Social Class, and Health Communication Inequalities: A Nationally-Representative Cross-Sectional Study

Kasisomayajula Viswanath<sup>1</sup>, Leland K. Ackerson<sup>2,3\*</sup>

**1** Center for Community-Based Research, Dana-Farber Cancer Institute, Boston, Massachusetts, United States of America, **2** Department of Society, Human Development, and Health, Harvard School of Public Health, Boston, Massachusetts, United States of America, **3** Department of Community Health and Sustainability, University of Massachusetts Lowell, Lowell, Massachusetts, United States of America

## Abstract

**Background:** While mass media communications can be an important source of health information, there are substantial social disparities in health knowledge that may be related to media use. The purpose of this study is to investigate how the use of cancer-related health communications is patterned by race, ethnicity, language, and social class.

**Methodology/Principal Findings:** In a nationally-representative cross-sectional telephone survey, 5,187 U.S. adults provided information about demographic characteristics, cancer information seeking, and attention to and trust in health information from television, radio, newspaper, magazines, and the Internet. Cancer information seeking was lowest among Spanish-speaking Hispanics (odds ratio: 0.42; 95% confidence interval: 0.28–0.63) compared to non-Hispanic whites. Spanish-speaking Hispanics were more likely than non-Hispanic whites to pay attention to (odds ratio: 3.10; 95% confidence interval: 2.07–4.66) and trust (odds ratio: 2.61; 95% confidence interval: 1.53–4.47) health messages from the radio. Non-Hispanic blacks were more likely than non-Hispanic whites to pay attention to (odds ratio: 2.39; 95% confidence interval: 1.88–3.04) and trust (odds ratio: 2.16; 95% confidence interval: 1.61–2.90) health messages on television. Those who were college graduates tended to pay more attention to health information from newspapers (odds ratio: 1.98; 95% confidence interval: 1.42–2.75), magazines (odds ratio: 1.86; 95% confidence interval: 1.32–2.60), and the Internet (odds ratio: 4.74; 95% confidence interval: 2.70–8.31) and had less trust in cancer-related health information from television (odds ratio: 0.44; 95% confidence interval: 0.32–0.62) and radio (odds ratio: 0.54; 95% confidence interval: 0.34–0.86) compared to those who were not high school graduates.

**Conclusions/Significance:** Health media use is patterned by race, ethnicity, language and social class. Providing greater access to and enhancing the quality of health media by taking into account factors associated with social determinants may contribute to addressing social disparities in health.

**Citation:** Viswanath K, Ackerson LK (2011) Race, Ethnicity, Language, Social Class, and Health Communication Inequalities: A Nationally-Representative Cross-Sectional Study. PLoS ONE 6(1): e14550. doi:10.1371/journal.pone.0014550

**Editor:** Erik von Elm, Swiss Paraplegic Research, Switzerland

**Received:** June 5, 2010; **Accepted:** December 15, 2010; **Published:** January 18, 2011

**Copyright:** © 2011 Viswanath, Ackerson. This is an open-access article distributed under the terms of the Creative Commons Attribution License, which permits unrestricted use, distribution, and reproduction in any medium, provided the original author and source are credited.

**Funding:** This work was supported by the Dana-Farber/Harvard Cancer Center (<http://www.dana-farber.org/res/dana-farber/default.html>). The funders had no role in study design, data collection and analysis, decision to publish, or preparation of the manuscript.

**Competing Interests:** The authors have declared that no competing interests exist.

\* E-mail: leland\_ackerson@uml.edu

## Introduction

The role of mass media and interpersonal communication in influencing health is widely acknowledged.[1,2,3] The function that communication plays in influencing health spans the entire disease continuum including prevention, diagnosis, treatment, survivorship, and end-of life care.[4,5] Information and knowledge about health has been shown to benefit those who use it in preventing, getting treatment for, recovering from, and dealing with the physical and psychological consequences of illness.[6,7,8,9]

Recent studies have shown that the benefits of health information are not equally distributed across socially distinct groups in the United States, and in fact there appear to be disparities in how people attend to and take advantage of health information.[10,11] These inequalities in communication parallel

with disparities in health. Communication inequality has been offered as one potential mechanism linking social determinants to health outcomes in the structural information model (SIM).[8] In brief, the SIM suggests that outcomes in individual and population health could be understood by examining how social determinants such as race, ethnicity, and class are related to how people access, seek, process, and use health information.

Three key dimensions of communication include health information seeking, attention to health in the media, and trust in the media. *Health information seeking* is a measure of how actively people look for health information.[12] This is a highly valued skill in the current consumer-driven health approach where people are expected to participate in decisions about their health, and information is a necessary resource in making those decisions.[13,14,15,16,17] While it is commonly assumed that those affected by major diseases actively seek information, there is

potential for disparities in information seeking among people of different socioeconomic position.[18] *Attention to health information* is an indicator of degree of interest in a topic and is related to health knowledge.[3] *Trust* is an indicator of esteem with which people hold a source of information and the extent to which they view the information believable.[19] While the physician has traditionally been a highly trusted information source, the emergence of digital media makes it important to document the patterns of trust in various information sources and the relation to social determinants in this new era.[20]

The purpose of this study is to use a nationally-representative sample to investigate the relationships that race, ethnicity, language, and social class have with the use of health communications including cancer information seeking, attention to health information in the mass media, and trust of cancer information from these media.

## Methods

### Data

The data for this project came from the 2003 Health Information National Trends Survey (HINTS 2003), a nationally-representative dataset of 6,369 US adults.[21] Briefly, HINTS is an initiative of the National Cancer Institute to collect national data about health communications, cancer knowledge and beliefs, and cancer-related behaviors. In the survey, US residents, regardless of citizenship, were selected through random digit dialing with oversampling of Hispanics and non-Hispanic blacks. Between October 2002 and April 2003, trained interviewers conducted computer-assisted telephone interviews in either English or Spanish, according to the preferred language of the respondent. The response rates were 55 percent for the household screener and 62.8 percent for the extended interview.

Since racial and ethnic identity was an important aspect of this study, we limited the dataset to those individuals who provided information about their racial and ethnic heritage. We also made an *a priori* decision to remove from the analysis those individuals from ethnic groups for whom our sample had an inadequate number of individuals to properly analyze. As a result, we removed 613 people of various racial and ethnic groups and limited our analysis to Hispanics, non-Hispanic blacks, and non-Hispanic whites where we had sufficient numbers (Figure 1). An additional 569 subjects were removed from the analyses due to missing information about the outcomes, predictors, or important covariates for a final sample size of 5,187.

### Outcome measures

This study investigated three main outcomes: cancer information seeking, attention to health information sources, and trust in cancer information sources. We measured cancer information seeking with the item, “Have you ever looked for information about cancer from any source?” with the answer given as yes or no. Attention was measured for five different health information sources: television, radio, Internet, newspaper, and magazines. Attention was measured using the question, “How much attention do you pay to information about health or medical topics [from this source]?” Trust was measured for each of seven cancer information sources: doctors or other health professionals, family or friends, television, radio, Internet, newspapers, and magazines. Trust was measured using the question, “How much would you trust the information about cancer from [this source]?” Answers for the trust and attention questions were a lot, some, a little, or not at all. We gave careful consideration to the use of these attention and trust variables in the analyses with the intention of

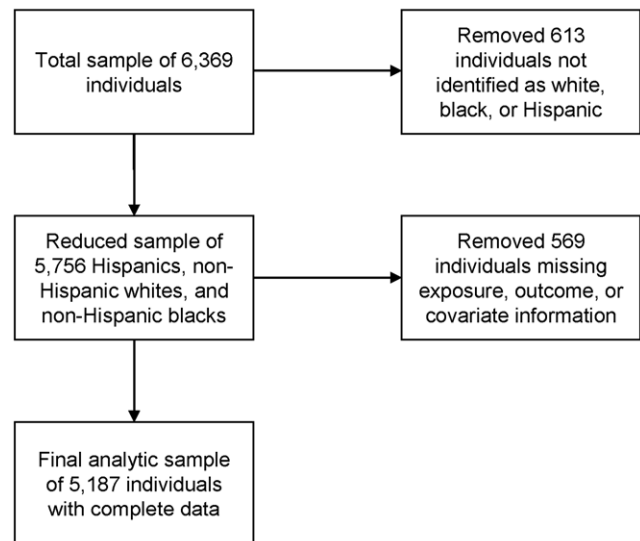

**Figure 1. Selection of eligible participants from the 2003 Health Information National Trends Survey.**

doi:10.1371/journal.pone.0014550.g001

dichotomizing the responses into high and low groups. Previous research has shown that positive changes in cancer knowledge and beliefs occur at the highest levels of trust and attention to health messages.[11] We conducted preliminary analyses dichotomizing the responses to these variables as “a lot or some” and “a little or not at all” trust or attention. These analyses showed that, under these circumstances, for nearly all of the variables, the response category “a lot or some” composed over half of the responses, indicating that it was a normative behavior (Table S1). As we were concerned with modeling non-normative levels of high trust and attention, we made a deliberate decision to collapse the responses to all of the trust and attention questions to create binary responses of either a lot or not a lot (some, a little, or not at all).

### Independent Variables

Self-reported race and ethnicity variables were combined into a single race/ethnicity variable. Interviewees selected whether they wanted to be interviewed in English or Spanish depending on which language they were more comfortable speaking. Preliminary investigations indicated that the Hispanic participants in the sample were evenly split between those preferring English and Spanish. In consideration of previous research finding variations in mass media use among Hispanics according to language,[22] the race/ethnicity variable was expanded into a race/ethnicity/language variable with the categories non-Hispanic white, non-Hispanic black, English-speaking Hispanic, and Spanish-speaking Hispanic. Education was categorized according to the highest level achieved as less than high school, high school graduate, some college, or college graduate. Annual household income was measured with the categories less than \$25,000; \$25,000–\$34,999; \$35,000–\$49,999; \$50,000–\$74,999; or \$75,000 or more.

### Covariates

A number of covariates that were hypothesized to be associated with both sociodemographic characteristics and health media use were included in the models namely sex, age, marital status, employment, rural/urban residence, health insurance, presence of children under age 18 in the household, having had cancer, and having had a family member with cancer. Gender was a binary

**Table 1.** Frequency and weighted percentages of socioeconomic and demographic variables among individuals in the HINTS 2003 survey.

| VARIABLE                     | N    | Weighted % |
|------------------------------|------|------------|
| <b>Race/ethnicity</b>        |      |            |
| Non-Hispanic White           | 3845 | 76.8       |
| English-speaking Hispanic    | 399  | 6.4        |
| Spanish-speaking Hispanic    | 299  | 6.0        |
| Non-Hispanic Black           | 644  | 10.7       |
| <b>Education</b>             |      |            |
| Less than high school        | 602  | 15.8       |
| High school                  | 1554 | 32.1       |
| Some college                 | 1406 | 27.5       |
| College graduate             | 1625 | 24.6       |
| <b>Household income</b>      |      |            |
| <\$25,000                    | 1561 | 28.6       |
| \$25,000 to <\$35,000        | 744  | 13.7       |
| \$35,000 to <\$50,000        | 892  | 17.3       |
| \$50,000 to <\$75,000        | 876  | 17.5       |
| ≥\$75,000                    | 1114 | 22.8       |
| <b>Employment</b>            |      |            |
| Employed                     | 3161 | 61.9       |
| Homemaker                    | 420  | 7.9        |
| Student                      | 199  | 5.7        |
| Retired                      | 898  | 14.5       |
| Not employed                 | 509  | 10.0       |
| <b>Urbanicity</b>            |      |            |
| Metro region ≥1 million      | 2539 | 48.5       |
| Metro region <1 million      | 1666 | 32.4       |
| Rural region ≥20,000         | 391  | 7.4        |
| Rural region <20,000         | 591  | 11.7       |
| <b>Age (in years)</b>        |      |            |
| 18–34                        | 1344 | 30.0       |
| 35–49                        | 1657 | 32.5       |
| 50–64                        | 1235 | 22.1       |
| 65–74                        | 541  | 9.3        |
| 75+                          | 410  | 6.1        |
| <b>Gender</b>                |      |            |
| Male                         | 2071 | 48.3       |
| Female                       | 3116 | 51.7       |
| <b>Marital status</b>        |      |            |
| Married or committed         | 2966 | 65.1       |
| Not married                  | 2221 | 34.9       |
| <b>Health insurance</b>      |      |            |
| Yes                          | 4533 | 85.7       |
| No                           | 654  | 14.3       |
| <b>Children under age 18</b> |      |            |
| No                           | 3146 | 57.0       |
| Yes                          | 2041 | 43.0       |
| <b>History of cancer</b>     |      |            |
| No                           | 4566 | 89.2       |
| Yes                          | 621  | 10.9       |

**Table 1.** Cont.

| VARIABLE                        | N           | Weighted %   |
|---------------------------------|-------------|--------------|
| <b>Family history of cancer</b> |             |              |
| No                              | 1890        | 36.8         |
| Yes                             | 3297        | 63.2         |
| <b>TOTAL</b>                    | <b>5187</b> | <b>100.0</b> |

doi:10.1371/journal.pone.0014550.t001

variable recorded as male or female. Age was grouped in the following categories: 18–34; 35–49; 50–64; 65–74; or 75 and older. Marital status was divided into two groups: those who were married or cohabiting and those who were not married or cohabiting. Employment was measured as employed, homemaker, student, retired, or not employed. Rural/urban residence was determined from county-level reports of the Economic Research Service of the United States Department of Agriculture [23] and was grouped in the following categories: counties in metropolitan areas with one million residents or more, counties in metropolitan areas with less than one million residents, counties in rural areas with 20,000 residents or more, or counties in rural areas with less than 20,000 residents. Health insurance, children under age 18, history of cancer, and family history of cancer were each coded as yes or no.

### Data analysis

Each outcome was modeled with logistic regression using the proc multilog procedure in SAS-callable SUDAAN version 9.0. Survey weights were applied to each model to account for multiple adjustments in the sampling procedure to ensure that the sample was representative of all US adults. A jackknife method was used to calculate standard errors of parameter estimates.

### Ethical considerations

The data collection procedures, in which subjects provided verbal informed consent, were approved by the National Institutes of Health Office of Human Subjects Research.[21] The use of this data for the current analysis was approved by the National Institutes of Health, the Harvard School of Public Health Office of Human Research Administration, and the University of Massachusetts Lowell Institutional Review Board.

### Results

#### Descriptive statistics

Over three quarters of the sample were non-Hispanic white, 11% were non-Hispanic black, with the remaining 12% split evenly between English- and Spanish-speaking Hispanics. Approximately one third of respondents had a high school education with 27% having some college and 25% having a college degree (Table 1). Those from households making less than \$25,000 per year comprised 29% of the total, with the remainder split roughly evenly among the four remaining groups. Roughly half of those surveyed reported having sought cancer information previously (Table 2).

A sensitivity analysis investigated the characteristics of individuals who were excluded from the main analyses because they provided incomplete data revealed evidence of disproportionately missing values (Table S2). Notably, those individuals who were most likely to be missing information were Spanish-speaking Hispanics, females, people aged 65 and older, and people who had less than a high school education.

**Table 2.** Frequency and weighted percentages of health media use variables among individuals in the HINTS 2003 survey.

| VARIABLE                        | N           | Weighted %   |
|---------------------------------|-------------|--------------|
| <b>Information seeking</b>      |             |              |
| Yes                             | 2502        | 46.1         |
| No                              | 2685        | 53.9         |
| <b>Attend television</b>        |             |              |
| A lot                           | 1788        | 32.3         |
| Not a lot                       | 3399        | 67.7         |
| <b>Attend radio</b>             |             |              |
| A lot                           | 828         | 15.1         |
| Not a lot                       | 4359        | 84.9         |
| <b>Attend newspaper</b>         |             |              |
| A lot                           | 1321        | 24.7         |
| Not a lot                       | 3866        | 75.3         |
| <b>Attend magazines</b>         |             |              |
| A lot                           | 1341        | 24.2         |
| Not a lot                       | 3846        | 75.8         |
| <b>Attend Internet</b>          |             |              |
| A lot                           | 690         | 12.7         |
| Not a lot                       | 4497        | 87.3         |
| <b>Trust doctors</b>            |             |              |
| A lot                           | 3201        | 61.7         |
| Not a lot                       | 1986        | 38.3         |
| <b>Trust family and friends</b> |             |              |
| A lot                           | 940         | 18.5         |
| Not a lot                       | 4247        | 81.5         |
| <b>Trust newspaper</b>          |             |              |
| A lot                           | 644         | 12.7         |
| Not a lot                       | 4543        | 87.3         |
| <b>Trust magazines</b>          |             |              |
| A lot                           | 807         | 15.7         |
| Not a lot                       | 4380        | 84.3         |
| <b>Trust radio</b>              |             |              |
| A lot                           | 466         | 9.7          |
| Not a lot                       | 4721        | 90.4         |
| <b>Trust Internet</b>           |             |              |
| A lot                           | 1222        | 23.9         |
| Not a lot                       | 3965        | 76.1         |
| <b>Trust television</b>         |             |              |
| A lot                           | 988         | 19.6         |
| Not a lot                       | 4199        | 80.4         |
| <b>TOTAL</b>                    | <b>5187</b> | <b>100.0</b> |

doi:10.1371/journal.pone.0014550.t002

### Cancer information seeking

Data in Table 3 indicate that, compared to non-Hispanic whites, Spanish-speaking Hispanics (odds ratio [OR] = 0.42; 95% confidence interval [CI] = 0.28–0.63) and English-speaking Hispanics (OR = 0.74; 95% CI = 0.55–1.00) were less likely to seek cancer information. Socioeconomic gradients were apparent such that those with higher levels of education and income were more likely to report seeking cancer information.

### Attention to health information sources

Non-Hispanic blacks were more likely to pay attention to health messages on television (OR = 2.39; 95% CI = 1.88–3.04), on the radio (OR = 1.98; 95% CI = 1.46–2.68), in newspapers (OR = 1.65; 95% CI = 1.25–2.19), and in magazines (OR = 1.87; 95% CI = 1.48–2.36) compared to non-Hispanic whites (Table 3). At the same time, Spanish-speaking Hispanics were more likely to pay attention to health messages on television (OR = 2.59; 95% CI = 1.82–3.69), on the radio (OR = 3.10; 95% CI = 2.07–4.66), and in magazines (OR = 1.67; 95% CI = 1.04–2.66) compared to non-Hispanic whites. Higher levels of education were associated with higher likelihood of paying a lot of attention to health information in various mass media sources. Household income had no association with attending to health messages.

### Trust in cancer information from media sources

Non-Hispanic blacks reported increased trust in cancer information from television (OR = 2.16; 95% CI = 1.61–2.90), radio (OR = 1.89; 95% CI = 1.20–2.98), newspapers (OR = 1.59; 95% CI = 1.10–2.31), and magazines (OR = 2.05; 95% CI = 1.46–2.88) compared to whites (Table 4). English-speaking Hispanics were more likely to report a lot of trust in cancer information from television (OR = 1.34; 95% CI = 1.01–1.79), and Spanish-speaking Hispanics were more likely to report a lot of trust in cancer information from both television (OR = 1.74; 95% CI = 1.14–2.65) and radio (OR = 2.61; 95% CI = 1.53–4.47) compared to non-Hispanic whites. College graduates were significantly less likely to report a lot of trust in cancer information from television and radio than those with less than high school education. An increased likelihood of reporting a lot of trust in cancer information from the Internet was found among those from upper income households.

### Trust in cancer information from interpersonal channels

Ethnicity was unrelated to trust in cancer information from interpersonal channels (Table 4). However, education was directly associated with reporting a lot of trust in cancer information from doctors and other medical professionals and income was inversely associated with reporting a lot of trust in cancer information from family and friends.

### Discussion

Race and ethnicity are social characteristics that, in an immigrant population in the United States, are often linked with the issue of English language proficiency. Our results indicated that the combination of race and ethnicity with language strongly influence health communication behaviors. The inability to speak fluent English may hinder the search for cancer information among Spanish-speaking Hispanics by limiting the available information sources and health content.[24] That both English- and Spanish-speaking Hispanics have lower rates of cancer information seeking may also result from culturally-based concepts of fatalism [25] and deference to medical professionals regarding health decisions.[26] Conversely, Spanish-speaking Hispanics and non-Hispanic blacks are the ethnic groups that are most likely to pay a lot of attention to and have a lot of trust in cancer messages from all kinds of media, excluding the Internet. Increased trust in cancer information from these media sources may result from social capital [27] that comes from the reliance of these populations on ethnically-targeted media outlets.[28,29]

We found education to be a consistently strong determinant of health communication behaviors. With the bewildering array of choices available in the information environment,[30] education may provide consumers with the skills, knowledge, and confidence

**Table 3.** Odd ratios (OR) and 95% Confidence Intervals (CI) of the association of cancer information seeking and paying a lot of attention to health media with race/ethnicity/language and social characteristics among U.S. adults in the HINTS 2003 study.

|                                | Information Seeking |              | Attend Television |              | Attend Radio    |              |
|--------------------------------|---------------------|--------------|-------------------|--------------|-----------------|--------------|
|                                | OR                  | 95% CI       | OR                | 95% CI       | OR              | 95% CI       |
| <b>Ethnicity</b>               |                     |              |                   |              |                 |              |
| Non-Hispanic White (ref)       | 1.00                |              | 1.00              |              | 1.00            |              |
| English-speaking Hispanic      | 0.74                | (0.55, 1.00) | 1.12              | (0.86, 1.47) | 1.15            | (0.76, 1.74) |
| Spanish-speaking Hispanic      | 0.42                | (0.28, 0.63) | 2.59              | (1.82, 3.69) | 3.10            | (2.07, 4.66) |
| Non-Hispanic Black             | 0.90                | (0.66, 1.21) | 2.39              | (1.88, 3.04) | 1.98            | (1.46, 2.68) |
| <b>Education</b>               |                     |              |                   |              |                 |              |
| Less than high school (ref)    | 1.00                |              | 1.00              |              | 1.00            |              |
| High school                    | 1.13                | (0.85, 1.51) | 1.12              | (0.85, 1.49) | 1.11            | (0.77, 1.60) |
| Some college                   | 1.66                | (1.22, 2.27) | 1.16              | (0.86, 1.58) | 1.20            | (0.79, 1.81) |
| College graduate               | 2.74                | (1.98, 3.81) | 1.25              | (0.93, 1.70) | 1.39            | (0.96, 2.01) |
| <b>Annual household income</b> |                     |              |                   |              |                 |              |
| <\$25,000 (ref)                | 1.00                |              | 1.00              |              | 1.00            |              |
| \$25,000 to <\$35,000          | 1.31                | (0.97, 1.77) | 1.09              | (0.88, 1.34) | 0.91            | (0.66, 1.25) |
| \$35,000 to <\$50,000          | 1.09                | (0.86, 1.38) | 0.90              | (0.73, 1.10) | 0.78            | (0.52, 1.17) |
| \$50,000 to <\$75,000          | 1.53                | (1.17, 2.00) | 1.08              | (0.81, 1.43) | 1.05            | (0.73, 1.51) |
| >=\$75,000                     | 1.56                | (1.14, 2.15) | 1.01              | (0.78, 1.30) | 0.92            | (0.63, 1.36) |
|                                | Attend Newspaper    |              | Attend Magazines  |              | Attend Internet |              |
|                                | OR                  | 95% CI       | OR                | 95% CI       | OR              | 95% CI       |
| <b>Ethnicity</b>               |                     |              |                   |              |                 |              |
| Non-Hispanic White (ref)       | 1.00                |              | 1.00              |              | 1.00            |              |
| English-speaking Hispanic      | 0.92                | (0.63, 1.33) | 0.87              | (0.62, 1.22) | 1.00            | (0.64, 1.58) |
| Spanish-speaking Hispanic      | 1.25                | (0.76, 2.05) | 1.67              | (1.04, 2.66) | 0.53            | (0.25, 1.13) |
| Non-Hispanic Black             | 1.65                | (1.25, 2.19) | 1.87              | (1.48, 2.36) | 1.26            | (0.85, 1.87) |
| <b>Education</b>               |                     |              |                   |              |                 |              |
| Less than high school (ref)    | 1.00                |              | 1.00              |              | 1.00            |              |
| High school                    | 1.44                | (1.09, 1.90) | 1.35              | (1.00, 1.83) | 2.04            | (1.13, 3.68) |
| Some college                   | 1.86                | (1.33, 2.62) | 1.90              | (1.38, 2.61) | 3.80            | (2.02, 7.15) |
| College graduate               | 1.98                | (1.42, 2.75) | 1.86              | (1.32, 2.60) | 4.74            | (2.70, 8.31) |
| <b>Annual household income</b> |                     |              |                   |              |                 |              |
| <\$25,000 (ref)                | 1.00                |              | 1.00              |              | 1.00            |              |
| \$25,000 to <\$35,000          | 0.90                | (0.69, 1.18) | 0.93              | (0.68, 1.26) | 0.96            | (0.53, 1.75) |
| \$35,000 to <\$50,000          | 0.76                | (0.55, 1.05) | 0.89              | (0.63, 1.26) | 1.04            | (0.56, 1.92) |
| \$50,000 to <\$75,000          | 0.88                | (0.61, 1.26) | 1.20              | (0.84, 1.73) | 1.18            | (0.61, 2.31) |
| >=\$75,000                     | 0.84                | (0.62, 1.15) | 1.06              | (0.75, 1.50) | 1.24            | (0.62, 2.46) |

Note: All models are additionally adjusted for employment, marital status, age, gender, rural/urban residence, health insurance coverage, children living in the home, personal cancer diagnosis, and family cancer diagnosis.

doi:10.1371/journal.pone.0014550.t003

to seek specific health information of interest, accounting for the educational gradient in cancer information seeking. The educational gradients in attention to health information from newspapers, magazines, and the Internet may arise from the fact that interpretation of information from these sources requires relatively high levels of literacy,[31,32] particularly when compared to information from television and radio. Additionally, education may enable people to communicate more effectively with medical professionals making them more trusting of information from this source.[33] An extensive review has shown that social class influences physician-patient interaction with social advantages potentially leading to better health outcomes.[34] At the same

time, education may allow individuals to sift through conflicting information in the media environment with a critical eye to determine what information is most relevant and truthful.[18] Since the overwhelming majority of television and radio programming in the United States is supported by commercial interests that sometimes conflict with health promoting messages, those with higher levels of education may tend to be less trusting of health information from television and radio.

While higher incomes could provide the resources to purchase the means to access the Internet such as broadband connections and computer hardware,[35] it is also likely that higher income individuals more frequently use computers as part of their

**Table 4.** Odd ratios (OR) and 95% Confidence Intervals (CI) of the association of having a lot of trust in cancer information from media and interpersonal sources with race/ethnicity/language and social class characteristics among U.S. adults in the HINTS 2003 study.

|                                | Trust Television |              | Trust Radio  |              | Trust Newspaper          |              | Trust Magazines |              |
|--------------------------------|------------------|--------------|--------------|--------------|--------------------------|--------------|-----------------|--------------|
|                                | OR               | 95% CI       | OR           | 95% CI       | OR                       | 95% CI       | OR              | 95% CI       |
| <b>Ethnicity</b>               |                  |              |              |              |                          |              |                 |              |
| Non-Hispanic White (ref)       | 1.00             |              | 1.00         |              | 1.00                     |              | 1.00            |              |
| English-speaking Hispanic      | 1.34             | (1.01, 1.79) | 1.27         | (0.81, 1.98) | 1.23                     | (0.80, 1.88) | 1.28            | (0.86, 1.89) |
| Spanish-speaking Hispanic      | 1.74             | (1.14, 2.65) | 2.61         | (1.53, 4.47) | 1.66                     | (0.86, 3.21) | 1.37            | (0.78, 2.41) |
| Non-Hispanic Black             | 2.16             | (1.61, 2.90) | 1.89         | (1.20, 2.98) | 1.59                     | (1.10, 2.31) | 2.05            | (1.46, 2.88) |
| <b>Education</b>               |                  |              |              |              |                          |              |                 |              |
| Less than high school (ref)    | 1.00             |              | 1.00         |              | 1.00                     |              | 1.00            |              |
| High school                    | 0.78             | (0.58, 1.05) | 0.86         | (0.61, 1.22) | 1.22                     | (0.87, 1.71) | 1.05            | (0.73, 1.50) |
| Some college                   | 0.72             | (0.50, 1.02) | 0.60         | (0.32, 1.12) | 1.15                     | (0.72, 1.83) | 1.08            | (0.67, 1.75) |
| College graduate               | 0.44             | (0.32, 0.62) | 0.54         | (0.34, 0.86) | 1.05                     | (0.67, 1.65) | 1.10            | (0.70, 1.72) |
| <b>Annual household income</b> |                  |              |              |              |                          |              |                 |              |
| <\$25,000 (ref)                | 1.00             |              | 1.00         |              | 1.00                     |              | 1.00            |              |
| \$25,000 to <\$35,000          | 0.84             | (0.59, 1.19) | 0.70         | (0.43, 1.15) | 0.71                     | (0.49, 1.03) | 0.84            | (0.59, 1.21) |
| \$35,000 to <\$50,000          | 0.72             | (0.47, 1.12) | 0.72         | (0.41, 1.26) | 0.64                     | (0.40, 1.04) | 0.69            | (0.44, 1.09) |
| \$50,000 to <\$75,000          | 0.87             | (0.57, 1.32) | 0.81         | (0.44, 1.50) | 0.69                     | (0.42, 1.12) | 0.84            | (0.53, 1.32) |
| >=\$75,000                     | 0.75             | (0.48, 1.17) | 0.66         | (0.34, 1.28) | 0.68                     | (0.43, 1.09) | 0.67            | (0.43, 1.04) |
|                                | Trust Internet   |              | Trust Doctor |              | Trust Family and Friends |              |                 |              |
|                                | OR               | 95% CI       | OR           | 95% CI       | OR                       | 95% CI       |                 |              |
| <b>Ethnicity</b>               |                  |              |              |              |                          |              |                 |              |
| Non-Hispanic White (ref)       | 1.00             |              | 1.00         |              | 1.00                     |              |                 |              |
| English-speaking Hispanic      | 1.03             | (0.76, 1.40) | 0.84         | (0.63, 1.11) | 0.89                     |              | (0.59, 1.34)    |              |
| Spanish-speaking Hispanic      | 0.97             | (0.57, 1.64) | 1.36         | (0.92, 2.01) | 1.33                     |              | (0.88, 2.00)    |              |
| Non-Hispanic Black             | 1.28             | (0.96, 1.70) | 0.89         | (0.71, 1.12) | 1.29                     |              | (0.98, 1.70)    |              |
| <b>Education</b>               |                  |              |              |              |                          |              |                 |              |
| Less than high school (ref)    | 1.00             |              | 1.00         |              | 1.00                     |              |                 |              |
| High school                    | 1.05             | (0.70, 1.57) | 1.24         | (0.98, 1.57) | 1.02                     |              | (0.74, 1.42)    |              |
| Some college                   | 0.93             | (0.61, 1.43) | 1.17         | (0.91, 1.50) | 0.95                     |              | (0.66, 1.37)    |              |
| College graduate               | 1.08             | (0.69, 1.68) | 1.71         | (1.35, 2.16) | 0.83                     |              | (0.59, 1.18)    |              |
| <b>Annual household income</b> |                  |              |              |              |                          |              |                 |              |
| <\$25,000 (ref)                | 1.00             |              | 1.00         |              | 1.00                     |              |                 |              |
| \$25,000 to <\$35,000          | 1.38             | (1.03, 1.86) | 0.88         | (0.71, 1.08) | 0.79                     |              | (0.62, 1.02)    |              |
| \$35,000 to <\$50,000          | 1.07             | (0.77, 1.47) | 0.95         | (0.74, 1.22) | 0.71                     |              | (0.50, 1.01)    |              |
| \$50,000 to <\$75,000          | 1.52             | (1.13, 2.04) | 1.02         | (0.81, 1.29) | 0.56                     |              | (0.39, 0.80)    |              |
| >=\$75,000                     | 1.34             | (1.00, 1.81) | 1.11         | (0.85, 1.46) | 0.54                     |              | (0.39, 0.75)    |              |

Note: All models are additionally adjusted for employment, marital status, age, gender, rural/urban residence, health insurance coverage, children living in the home, personal cancer diagnosis, and family cancer diagnosis.  
doi:10.1371/journal.pone.0014550.t004

employment.[36] This increased access may in turn promote familiarity with and trust in the Internet that provides an individual with confidence and technical knowledge necessary to seek information about health. Access to numerous trusted sources of health information may also account for reduced reliance on information from other informal health sources such as friends and family.

Our data also go beyond the widely documented “digital divide” in which those of lower socioeconomic status have less access to the Internet [37,38] by examining a gamut of

information services available to a consumer today. Our research indicates that, apart from simply accessing the Internet, individuals of lower educational status are less likely to pay a lot of attention to and less likely to have a lot of trust in health information on the Internet. It is possible that lack of familiarity with the medium and the complexity in navigating the Web could potentially deter people from a lower socioeconomic status to make effective use of the Internet for health.

We document differences across a variety of media regarding how familiarity and use of the media may influence information

seeking, attention, and trust. This information suggests a number of ways that mass media can be used to promote health among particular populations. For example, the evidence indicates that health and medical professionals might effectively use television and radio to communicate health preserving messages to non-Hispanic blacks and Spanish-speaking Hispanics given their affinity for these media. Institutions that use media to communicate health information could make efforts to construct messages in formats and manners that are accessible to a variety of groups. Additionally, projects that promote access to broadband services and training in the use of the Internet, particularly among low-income individuals, may promote familiarity with this medium that could allow these individuals to access a wider array of health-promoting information.

### Limitations

While major topics of this study included attention to and trust in cancer information in the mass media, no attempt was made to measure the content of these media sources. For example, health information on television could be interpreted equally as a health theme in a situation comedy, a brief story on the evening news, or a thorough and balanced documentary. Since a majority of mass media dissemination in the United States is supported by commercial interests, particularly in the fields of television and radio, it is likely that individuals who reported using these media were exposed to substantial amounts of paid advertising. This study did not distinguish between health media messages that were intended to be informational and those that were intended to sell health-influencing products. Furthermore, the survey data did not distinguish between those media outlets intended for a general audience and ethnic media meant to appeal to a specific cultural group. Thus, it may be that people of different ethnicities tend to conceive of health media in different ways in relation to their own social group and thus differentially report trust and attention. Additionally, the measures of information seeking and trust asked the respondents about attitudes towards cancer information in the media, and may not be representative of media-related behaviors that deal with other types of health information. The observational nature of the data prevents us from making causal inferences from our results. However, the outcomes of interest in this study— aspects of health media use—are unlikely to precede the exposures under investigation—race/ethnicity/language, education, and income—thereby reducing the chance of the results reflecting reverse causation.

In terms of sample selection, the use of random digit dialing to recruit participants for this study would tend to exclude those

individuals without home telephones and those who spend little time at home. In addition, we removed 569 individuals who were missing information about an outcome, exposure, or covariate of interest. While this number was less than 10% of the original sample, there was some patterning of missing variables. Individuals who were Spanish-speaking Hispanics, female, aged 65 or older, and who never graduated from high school were more likely to be removed from the analysis. Finally, the sample sizes were inadequate to allow for the analysis of races and ethnicities other than Hispanics, non-Hispanic whites, and non-Hispanic blacks so we were forced to remove individuals who did not identify with one of these groups from the analysis. These factors challenge the nationally-representative nature of the final sample analyzed in this study.

### Conclusion

These data show that important social determinants such as race, ethnicity, language, and social class that have been found to influence health outcomes are also strongly linked to health communication behaviors such as cancer information seeking, attention to health in the media, and trust in cancer information from communication sources. The data also point out potential ways to reach the underserved to bridge current disparities in health by improving access to and quality of the health information for socially marginalized groups.

### Supporting Information

**Table S1** Frequency of health media use variables dichotomized by combining responses.

Found at: doi:10.1371/journal.pone.0014550.s001 (0.05 MB DOC)

**Table S2** Association of missing values with outcome and covariate variables.

Found at: doi:10.1371/journal.pone.0014550.s002 (0.15 MB DOC)

### Acknowledgments

We would like to thank the National Cancer Institute for making the HINTS 2003 data available to us.

### Author Contributions

Conceived and designed the experiments: KV LKA. Performed the experiments: LKA. Analyzed the data: KV LKA. Contributed reagents/materials/analysis tools: KV LKA. Wrote the paper: KV LKA.

### References

- Nielsen-Bohlman L, Panzer AM, Kindig DA, eds (2004) Health Literacy: A Prescription to End Confusion. Washington, D.C.: Institute of Medicine, National Research Council, The National Academies Press. 345 p.
- Ackerson LK, Viswanath K (2009) The social context of interpersonal communication and health. *J Health Commun* 14(Suppl 1): 5–17.
- Viswanath K (2006) Public communications and its role in reducing and eliminating health disparities. In: Thomson GE, Mitchell F, Williams MB, eds. *Examining the Health Disparities Research Plan of the National Institutes of Health: Unfinished Business*. Washington, D.C.: Institute of Medicine. pp 215–253.
- Viswanath K (2005) The communications revolution and cancer control. *Nature reviews cancer* 5: 828–835.
- Institute of Medicine (2003) *Unequal treatment: confronting racial and ethnic disparities in health care*. Washington, DC: National Academies Press.
- Finnegan JR, Viswanath K (2002) Communication theory and health behavior change: the media studies framework. In: Glanz K, Lewis M, Rimer K, eds. *Health Behavior and Health Education: Theory, Research, and Practice*. San Francisco, CA: Jossey-Bass, Inc. pp 361–388.
- Hornik R (2002) Public health communication: Making sense of contradictory evidence. In: Hornik R, ed. *Public Health Communication: Evidence for Behavior Change*. New York: Lawrence Erlbaum. pp 1–22.
- Viswanath K, Ramanadhan S, Kontos EZ (2007) Mass Media. In: Galea S, ed. *Macrosocial determinants of population health*. New York: Springer. pp 275–294.
- Institute of Medicine, Committee on Communication for Behavior Change in the 21st Century: Improving the Health of Diverse Populations (2002) *Speaking of health: Assessing health communication strategies for diverse populations*. Washington, DC: National Academies Press.
- Freimuth VS, Quinn SC (2004) The contributions of health communication to eliminating health disparities. *American Journal of Public Health* 94: 2053–2055.
- Viswanath K, Breen N, Meissner H, Moser RP, Hesse B, et al. (2006) Cancer knowledge and disparities in the information age. *J Health Commun* 11(Suppl 1): 1–17.
- Niederdeppe J, Hornik RC, Kelly BJ, Frosch DL, Romantan A, et al. (2007) Examining the dimensions of cancer-related information seeking and scanning Behavior. *Health Communication* 22: 153–167.
- Rimer BK, Briss PA, Zeller PK, Chan EC, Woolf SH (2004) Informed decision making: what is its role in cancer screening? *Cancer* 101: 1214–1228.
- Duggan C, Bates I (2008) Medicine information needs of patients: the relationships between information needs, diagnosis and disease. *Quality & Safety in Health Care* 17: 85–89.

15. Eakin EG, Strycker LA (2001) Awareness and barriers to use of cancer support and information resources by HMO patients with breast, prostate, or colon cancer: patient and provider perspectives. *Psychooncology* 10: 103–113.
16. Mayer DK, Terrin NC, Kreps GL, Menon U, McCance K, et al. (2007) Cancer survivors information seeking behaviors: A comparison of survivors who do and do not seek information about cancer. *Patient Education and Counseling* 65: 342–350.
17. Rutten IJ, Squiers L, Hesse B (2006) Cancer-related information seeking: hints from the 2003 Health Information National Trends Survey (HINTS). *J Health Commun* 11(Suppl 1): 147–156.
18. Ramanadhan S, Viswanath K (2006) Health and the information nonseeker: a profile. *Health Commun* 20: 131–139.
19. Gronke P, Cook TE (2007) Disdaining the media: The American public's changing attitudes toward the news. *Political Communication* 24: 259–281.
20. Hesse BW, Nelson DE, Kreps GL, Croyle RT, Arora NK, et al. (2005) Trust and sources of health information: the impact of the Internet and its implications for health care providers: findings from the first Health Information National Trends Survey. *Arch Intern Med* 165: 2618–2624.
21. Nelson DE, Kreps GL, Hesse BW, Croyle RT, Willis G, et al. (2004) The Health Information National Trends Survey (HINTS): development, design, and dissemination. *J Health Commun* 9: 443–460; discussion 481–444.
22. Gordon NP, Iribarren C (2008) Health-related characteristics and preferred methods of receiving health education according to dominant language among Latinos Aged 25 to 64 in a large Northern California health plan. *Bmc Public Health* 8: 10.
23. USDA (2008) Measuring Rurality: Rural-Urban Continuum Codes. U.S. Department of Agriculture, Economic Research Service. Available: <http://www.ers.usda.gov/briefing/Rurality/RuralUrbCon/>.
24. Duerksen SC, Mikail A, Tom L, Patton A, Lopez J, et al. (2005) Health disparities and advertising content of women's magazines: a cross-sectional study. *Bmc Public Health* 5: 85.
25. Abraido-Lanza AF, Viladrich A, Florez KR, Cespedes A, Aguirre AN, et al. (2007) Commentary: Fatalismo reconsidered: A cautionary note for health-related research and practice with Latino populations. *Ethnicity & Disease* 17: 153–158.
26. Levinson W, Kao A, Kuby A, Thisted RA (2005) Not all patients want to participate in decision making - A national study of public preferences. *Journal of General Internal Medicine* 20: 531–535.
27. Beaudoin CE (2007) Mass media use, neighborliness, and social support - Assessing causal links with panel data. *Communication Research* 34: 637–664.
28. Cheong PH (2007) Health communication resources for uninsured and insured Hispanics. *Health Communication* 21: 153–163.
29. Baty BJ, Kinney AY, Ellis SM (2003) Developing culturally sensitive cancer genetics communication aids for African Americans. *American Journal of Medical Genetics Part A* 118A: 146–155.
30. Arora NK, Hesse BW, Rimer BK, Viswanath K, Clayman ML, et al. (2007) Frustrated and Confused: The American Public Rates its Cancer-Related Information-Seeking Experiences. *J Gen Intern Med* 23: 223–228.
31. Berland GK, Elliott MN, Morales LS, Algazy JL, Kravitz RL, et al. (2001) Health information on the Internet: accessibility, quality, and readability in English and Spanish. *Jama* 285: 2612–2621.
32. Friedman DB, Hoffman-Goetz L (2003) Cancer coverage in North American publications targeting seniors. *Journal of Cancer Education* 18: 43–47.
33. Willems S, De Maesschalck S, Deveugele M, Derese A, De Maeseeneer J (2005) Socio-economic status of the patient and doctor-patient communication: does it make a difference? *Patient Educ Couns* 56: 139–146.
34. Cooper L, Roter D (2003) Patient-provider communication: The effect of race and ethnicity on process and outcomes of healthcare. In: Smedley B, Stith A, Nelson A, eds. *Unequal Treatment: Confronting Racial and Ethnic Disparities in Healthcare*. Washington, D.C.: The National Academies Press.
35. Martin SP, Robinson JP (2007) The income digital divide: Trends and predictions for levels of Internet use. *Social Problems* 54: 1–22.
36. McNeill LH, Puleo E, Bennett GG, Emmons KM (2007) Exploring social contextual correlates of computer ownership and frequency of use among urban, low-income, public housing adult residents. *Journal of Medical Internet Research* 9: 27.
37. Brodie M, Flournoy RE, Altman DE, Blendon RJ, Benson JM, et al. (2000) Health information, the Internet, and the digital divide. *Health Affairs* 19: 255–265.
38. Cotten SR, Gupta SS (2004) Characteristics of online and offline health information seekers and factors that discriminate between them. *Social Science & Medicine* 59: 1795–1806.
